# Supplementary material for: Non-Conventional Methodologies in the Synthesis of 1-Indanones
Source: PubMed Central journal article supplement (PMC6271961; doi:10.3390/molecules19055599), 2014-04-30

# Supplementary Material

## <sup>1</sup>H- and <sup>13</sup>C-NMR Spectra of 1a

### 6-Methoxy-2,3-dihydro-1H-inden-1-one (1a)

<sup>1</sup>H-NMR  $\delta$  (ppm) (300 MHz, CDCl<sub>3</sub>): 2.6–2.8 (m, 2H<sub>1</sub>), 3.0–3.1 (m, 2H<sub>2</sub>), 3.8 (s, 3H, OMe), 7.1–7.2 (m, 1H<sub>3</sub>), 7.3–7.4 (m, 2H<sub>4,5</sub>); <sup>13</sup>C-NMR (300 MHz, CDCl<sub>3</sub>):  $\delta$  205, 160, 148, 139, 126, 125, 105, 55, 37, 25.

**Figure S1.** <sup>1</sup>H- and <sup>13</sup>C-NMR Spectra of 6-Methoxy-2,3-dihydro-1H-inden-1-one (1a).

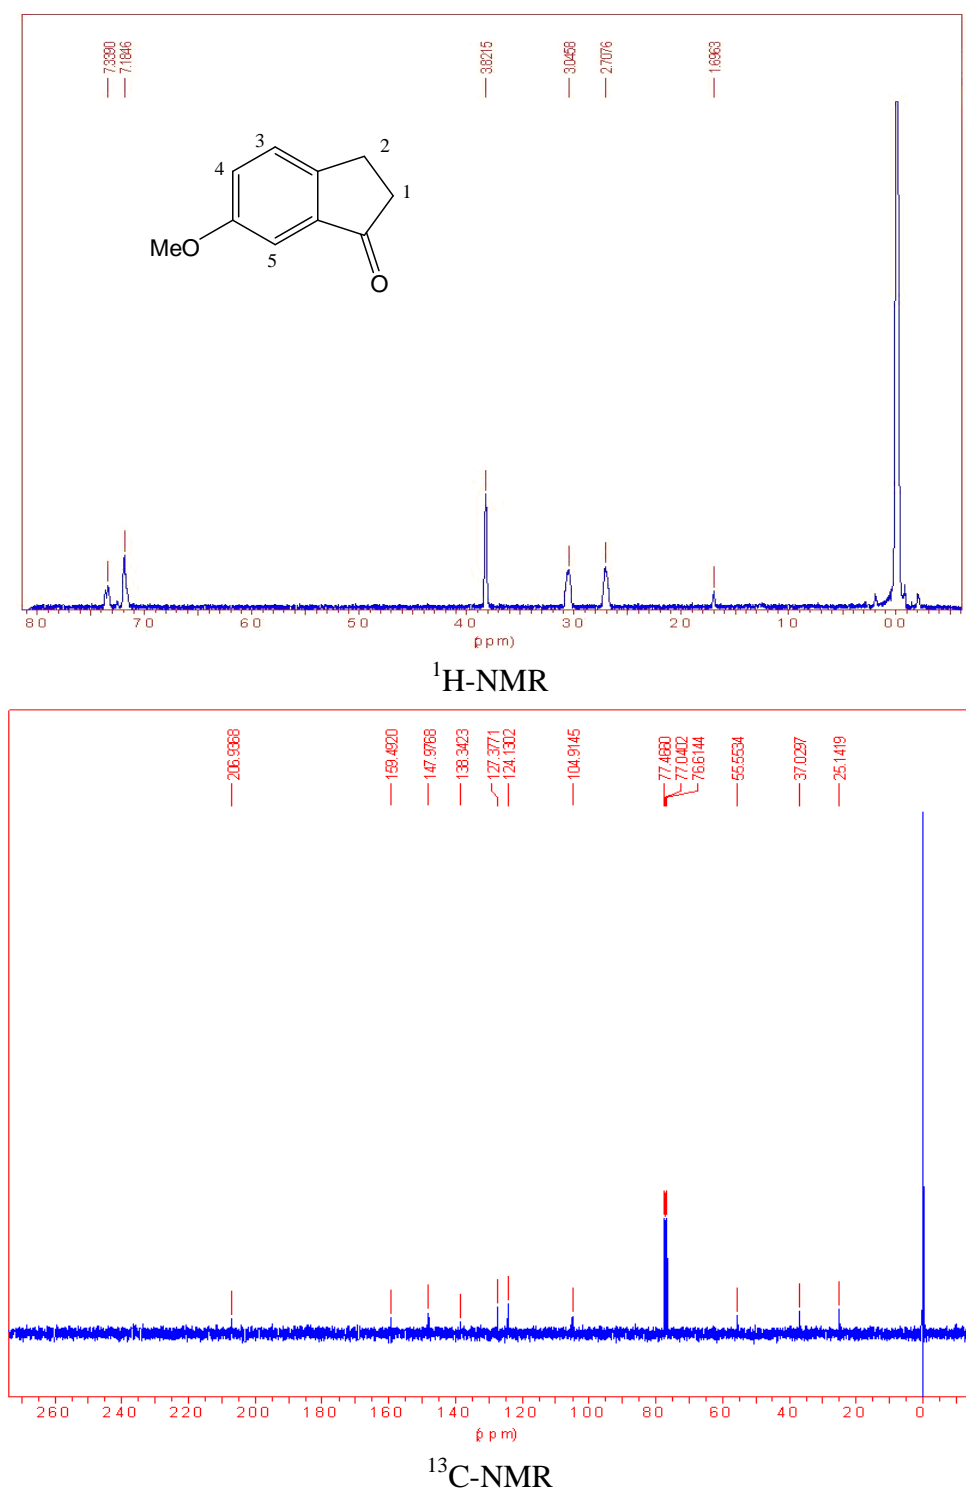

**$^1\text{H}$ - and  $^{13}\text{C}$ -NMR Spectra of 4a***4-Methyl-2,3-dihydro-1H-inden-1-one (4a)*

$^1\text{H}$ -NMR  $\delta$  (ppm) (300 MHz,  $\text{CDCl}_3$ ): 2.36 (s, 3H<sub>3</sub>), 2.67–2.73 (m, 2H<sub>1</sub>) 3.02 (t, 2H<sub>2</sub>,  $J = 6\text{Hz}$ ), 7.29 (t, 1H<sub>5</sub>,  $J = 7\text{Hz}$ ), 7.40 (d, 1H<sub>4</sub>,  $J = 7\text{Hz}$ ), 7.60 (d, 1H<sub>6</sub>,  $J = 7\text{Hz}$ ).  $^{13}\text{C}$ -NMR (300 MHz,  $\text{CDCl}_3$ ):  $\delta$  207.4, 154.1, 136.9, 135.9, 135.0, 127.5, 121.1, 36.2, 24.6, 17.7.

**Figure S2.**  $^1\text{H}$ - and  $^{13}\text{C}$ -NMR Spectra of 4-Methyl-2,3-dihydro-1H-inden-1-one (**4a**).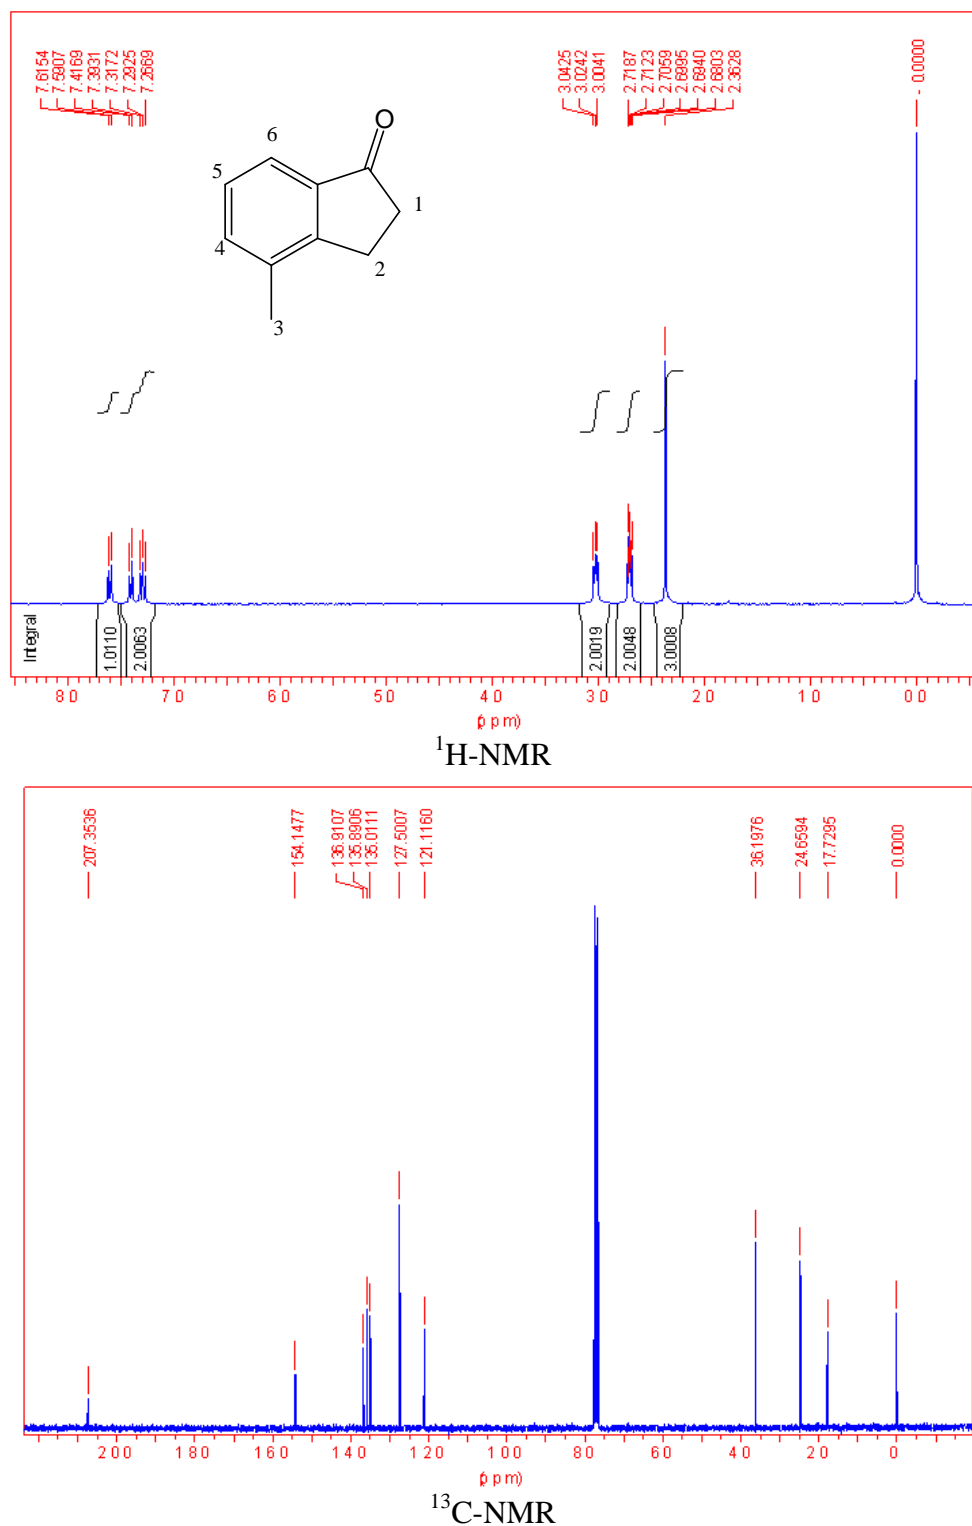

**<sup>1</sup>H- and <sup>13</sup>C-NMR spectra of 5a***5,6-dimethoxy-2,3-dihydro-1H-inden-1-one (5a)*

<sup>1</sup>H-NMR δ (ppm) (300 MHz, CDCl<sub>3</sub>): 2.68 (m, 2H<sub>1</sub>), 3.06 (t, 2H<sub>2</sub>, *J* = 6Hz), 3.91 (s, 3H<sub>4</sub>), 3.98 (s, 3H<sub>5</sub>), 6.90 (s, 1H<sub>3</sub>), 7.19 (s, 1H<sub>6</sub>). <sup>13</sup>C-NMR (300 MHz, CDCl<sub>3</sub>): δ 205.7, 155.4, 150.4, 149.4, 129.9, 107.5, 104.2, 56.2, 56.1, 36.5, 25.6.

**Figure S3.** <sup>1</sup>H- and <sup>13</sup>C-NMR spectra of 5,6-dimethoxy-2,3-dihydro-1H-inden-1-one (**5a**).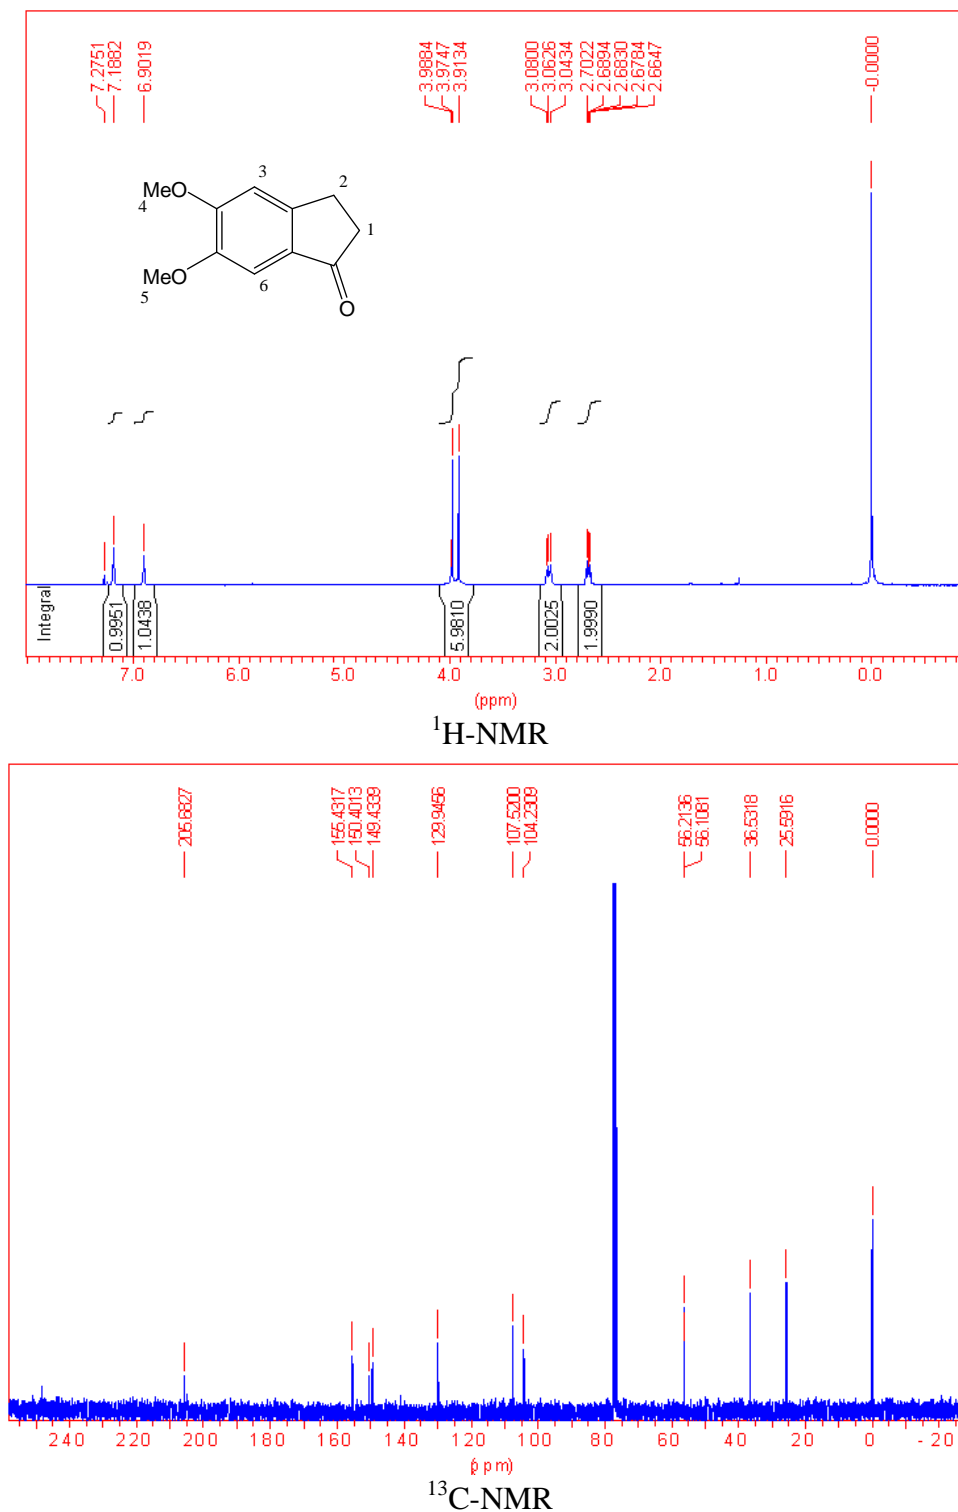

**<sup>1</sup>H- and <sup>13</sup>C-NMR Spectra of 9a***2,3-dihydro-1H-inden-1-one (9a)*

<sup>1</sup>H-NMR  $\delta$  (ppm) (300 MHz, CDCl<sub>3</sub>): 2.69 (m, 2H<sub>1</sub>), 3.15 (t, 2H<sub>2</sub>,  $J = 6$ Hz), 7.37 (m, 1H<sub>5</sub>); 7.48 (m, 1H<sub>3</sub>), 7.60 (m, 1H<sub>4</sub>), 7.76 (m, 1H<sub>6</sub>). <sup>13</sup>C-NMR (300 MHz, CDCl<sub>3</sub>):  $\delta$  207.1, 155.2, 137.1, 134.6, 127.3, 126.7, 123.7, 36.2, 25.8.

**Figure S4.** <sup>1</sup>H- and <sup>13</sup>C-NMR Spectra of 2,3-dihydro-1H-inden-1-one (**9a**).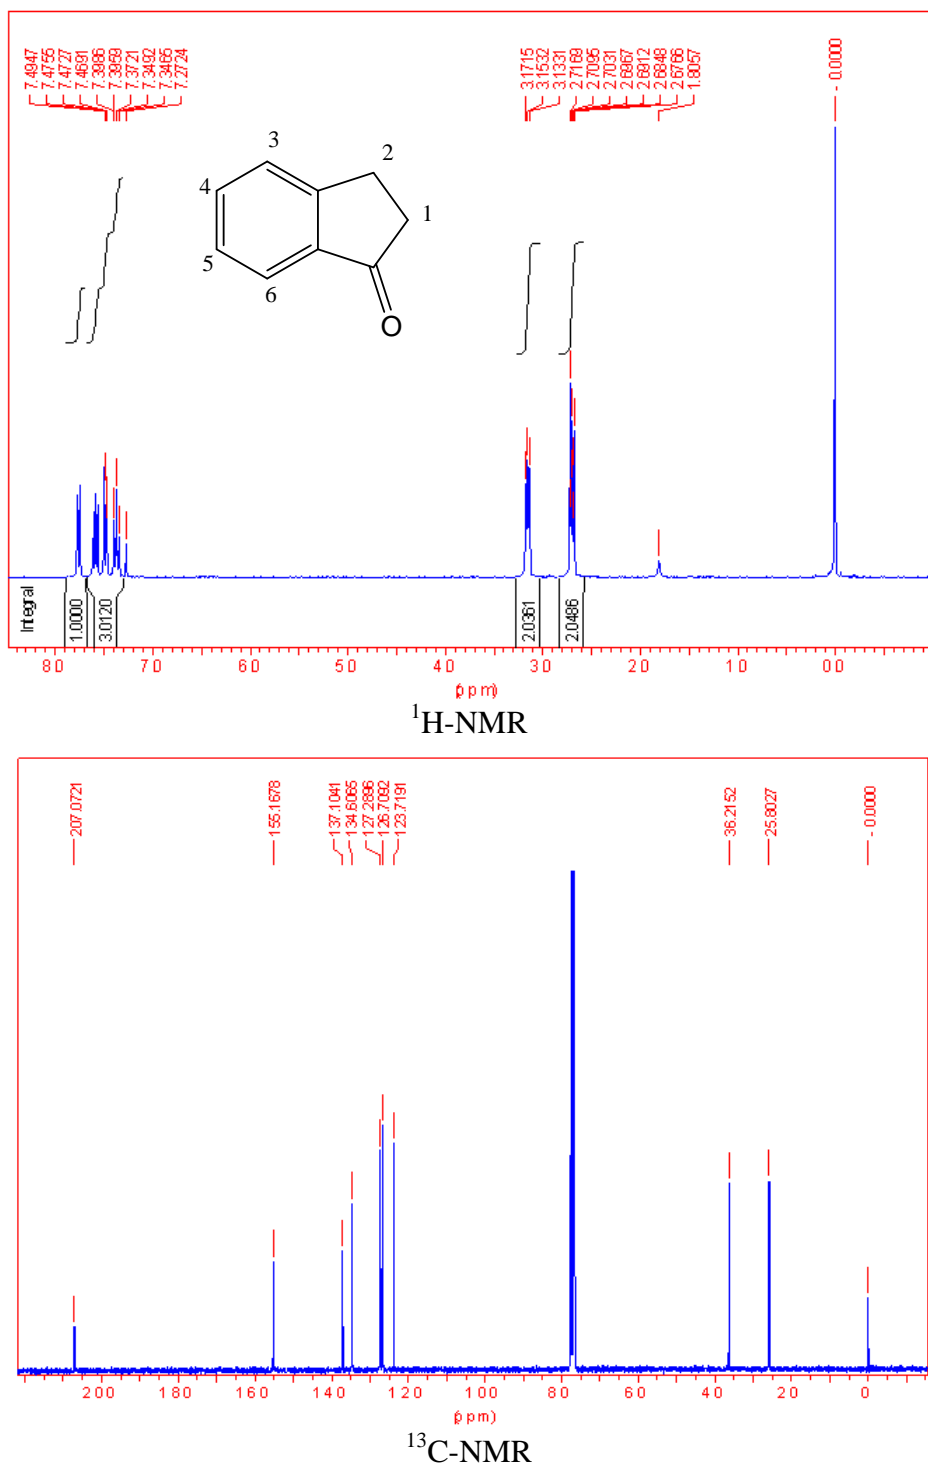

Supplement: molecules-19-05599-s001.pdf [file molecules-19-05599-s001.pdf]
